# Supplementary material for: RETRACTED ARTICLE: P16INK4a Deletion Ameliorated Renal Tubulointerstitial Injury in a Stress-induced Premature Senescence Model of Bmi-1 Deficiency
Source: PubMed Central journal article supplement (PMC5548892; doi:10.1038/s41598-017-06868-8), 2017-08-08
Supplement: 41598_2017_6868_MOESM1_ESM.pdf [file 41598_2017_6868_MOESM1_ESM.pdf]

***P16<sup>INK4a</sup>* Deletion Ameliorated Renal Tubulointerstitial Injury in a Stress-induced Premature Senescence Model of *Bmi-1* Deficiency**

Jianliang Jin<sup>1</sup>, Jianguo Tao<sup>1</sup>, Xin Gu<sup>1</sup>, Zhenzhen Yu<sup>1</sup>, Rong Wang<sup>1</sup>, Guoping Zuo<sup>2</sup>, Qing Li<sup>3</sup>, Xianhui Lv<sup>1#</sup> and Dengshun Miao<sup>1#</sup>

<sup>1</sup>The State Key Laboratory of Reproductive Medicine; Research Centre for Bone and Stem Cells, Department of Human Anatomy, Histology and Embryology; Nanjing Medical University; Nanjing, Jiangsu, 211166; China

<sup>2</sup>Laboratory Centre for Basic Medical Sciences, Nanjing Medical University, Nanjing, Jiangsu, 211166; China

<sup>3</sup>Department of Science and Technology, Jiangsu Jiankang Vocational College, Nanjing, Jiangsu, 210029; China

#Address all correspondence and requests for reprints to:

Dr. Dengshun Miao

E-mail: [dsmiao@njmu.edu.cn](mailto:dsmiao@njmu.edu.cn)

Or Dr. Xianhui Lv

E-mail: [lyuxianhui@163.com](mailto:lyuxianhui@163.com)

The State Key Laboratory of Reproductive Medicine;

Research Centre for Bone and Stem Cells;

Department of Anatomy, Histology and Embryology

Nanjing Medical University

No.101, Longmian Avenue, Jiangning District

Nanjing, Jiangsu 211166

The People's Republic of China

Tel & FAX: 0086-25-86869377

(a)

■ WT

■ Bmi-1<sup>-/-</sup>

■ Bmi-1<sup>-/-</sup>p16<sup>-/-</sup>

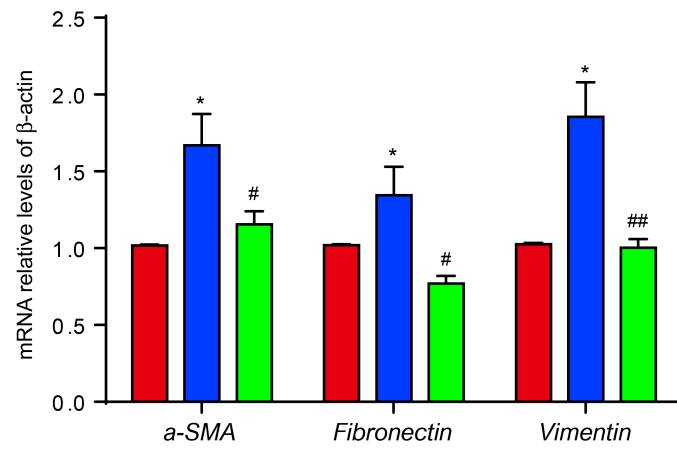

**Figure S1 | The mesenchymal characterization of renal interstitial fibroblasts. (a)**

Second-passage renal interstitial fibroblasts detected for  $\alpha$ -SMA, *fibronectin* and *vimentin* mRNA levels by real-time RT-PCR, calculated as ratio to  $\beta$ -actin mRNA.

Six biological replicates were used for these studies per experiment. Values are mean

$\pm$  SEM of six determinations per group. \*: P < 0.05 compared with WT group; #: P <

0.05, ##: P < 0.01 compared with *Bmi-1*<sup>-/-</sup> group.

**Table S1 | Synthesized shDNAs encoding human *Bmi-1*-specific shRNA or Negative control**

| Name                        | 5'                 | STEM                    | Loop       | STEM                     | 3'         |
|-----------------------------|--------------------|-------------------------|------------|--------------------------|------------|
| human<br><i>Bmi-1</i> -RNAi | ccg<br>g           | AATGGACATACCTAAT<br>ACT | CTCG<br>AG | AGTATTAGGTATGTC<br>CATT  | TTTT<br>Tg |
|                             | aatt<br>caa<br>aaa | AATGGACATACCTAAT<br>ACT | CTCG<br>AG | AGTATTAGGTATGTC<br>CATT  |            |
| Negative<br>control         | ccg<br>g           | CTACCGTTGTTAAGG<br>TGT  | CTCG<br>AG | GACACCTATAACAA<br>CGGTAG | TTTT<br>Tg |
|                             | aatt<br>caa<br>aaa | CTACCGTTGTTAAGG<br>TGT  | CTCG<br>AG | GACACCTATAACAA<br>CGGTAG |            |

**Table S2 | Primers for Real Time RT-PCR**

| Name                           | S/<br>AS | Sequence                     | Species | T <sub>m</sub> (°C) | Length<br>(bp) |
|--------------------------------|----------|------------------------------|---------|---------------------|----------------|
| <i>IL-1β</i>                   | S        | 5'-GCAACTGTTCTGAACTCAACT-3'  | mouse   | 60                  | 89             |
|                                | AS       | 5'-ATCTTTTGGGGTCCGTCAACT-3'  |         |                     |                |
| <i>IL-6</i>                    | S        | 5'-GTTGCCTTCTTGGGACTGATG-3'  | mouse   | 58                  | 192            |
|                                | AS       | 5'-ATCAGAATTGCCATTGCACAA-3'  |         |                     |                |
| <i>TNF-α</i>                   | S        | 5'-TCCCTCTCATCAGTTCTATGG-3'  | mouse   | 55                  | 100            |
|                                | AS       | 5'-ACTTGGTGGTTTGCTACGAC-3'   |         |                     |                |
| <i>NF-κB</i>                   | S        | 5'-CTTGCCAGACACAGATGATCG-3'  | mouse   | 58                  | 163            |
|                                | AS       | 5'-GGGGACAGAAGTTGAGTTTC-3'   |         |                     |                |
| <i>Iα(OH)ase<br/>(Cyp27b1)</i> | S        | 5'-CTTTGGGACACTTCGCACAG-3'   | mouse   | 56                  | 105            |
|                                | AS       | 5'-GCCCATGATGAGAACTACAG-3'   |         |                     |                |
| <i>EPO</i>                     | S        | 5'-GGAGAGGTACATCTTAGAGGC-3'  | mouse   | 53                  | 105            |
|                                | AS       | 5'-TTGACTTTGGTATCTGGGACT-3'  |         |                     |                |
| <i>GAPDH</i>                   | S        | 5'-CATTTCACTCAAGGTTGTCAGC-3' | mouse   | 55                  | 346            |
|                                | AS       | 5'-ATCATACTTGGCAGGTTTCTCC-3' |         |                     |                |
| <i>α-SMA</i>                   | S        | 5'-GCTGTGCTGTCCCTCTATGCC-3'  | mouse   | 57                  | 131            |
|                                | AS       | 5'-GCCAAGTCCAGACGCATGATG-3'  |         |                     |                |
| <i>fibronectin</i>             | S        | 5'-TTTGTGGTCTCATGGGTCTCA-3'  | mouse   | 57                  | 136            |
|                                | AS       | 5'-GCAGGTCAGGAATGTTCCACG-3'  |         |                     |                |
| <i>vimentin</i>                | S        | 5'-GAGGTGGAGCGGGACAAC-3'     | mouse   | 57                  | 94             |
|                                | AS       | 5'-GGGTGCTTTCGGCTTCCTCTC-3'  |         |                     |                |
| <i>β-actin</i>                 | S        | 5'-GGCTGTATTCCCCTCCATCG-3'   | mouse   | 58                  | 326            |
|                                | AS       | 5'-CCAGTTGGTAACAATGCCATGT-3' |         |                     |                |
| <i>Bmi-1</i>                   | S        | 5'-AAGGAGGAGGTGAATGATAA-3'   | human   | 55                  | 114            |
|                                | AS       | 5'-ATCAATCTGGAAAGTATTAGG-3'  |         |                     |                |
| <i>GAPDH</i>                   | S        | 5'-AGCGACACCCACTCCTCC-3'     | human   | 55                  | 108            |
|                                | AS       | 5'-CCTGTTGCTGTAGCCAAATTC-3'  |         |                     |                |

S, sense; AS, antisense, sequence; T<sub>m</sub>, annealing temperature; length, amplicon

## DNA Sequencing

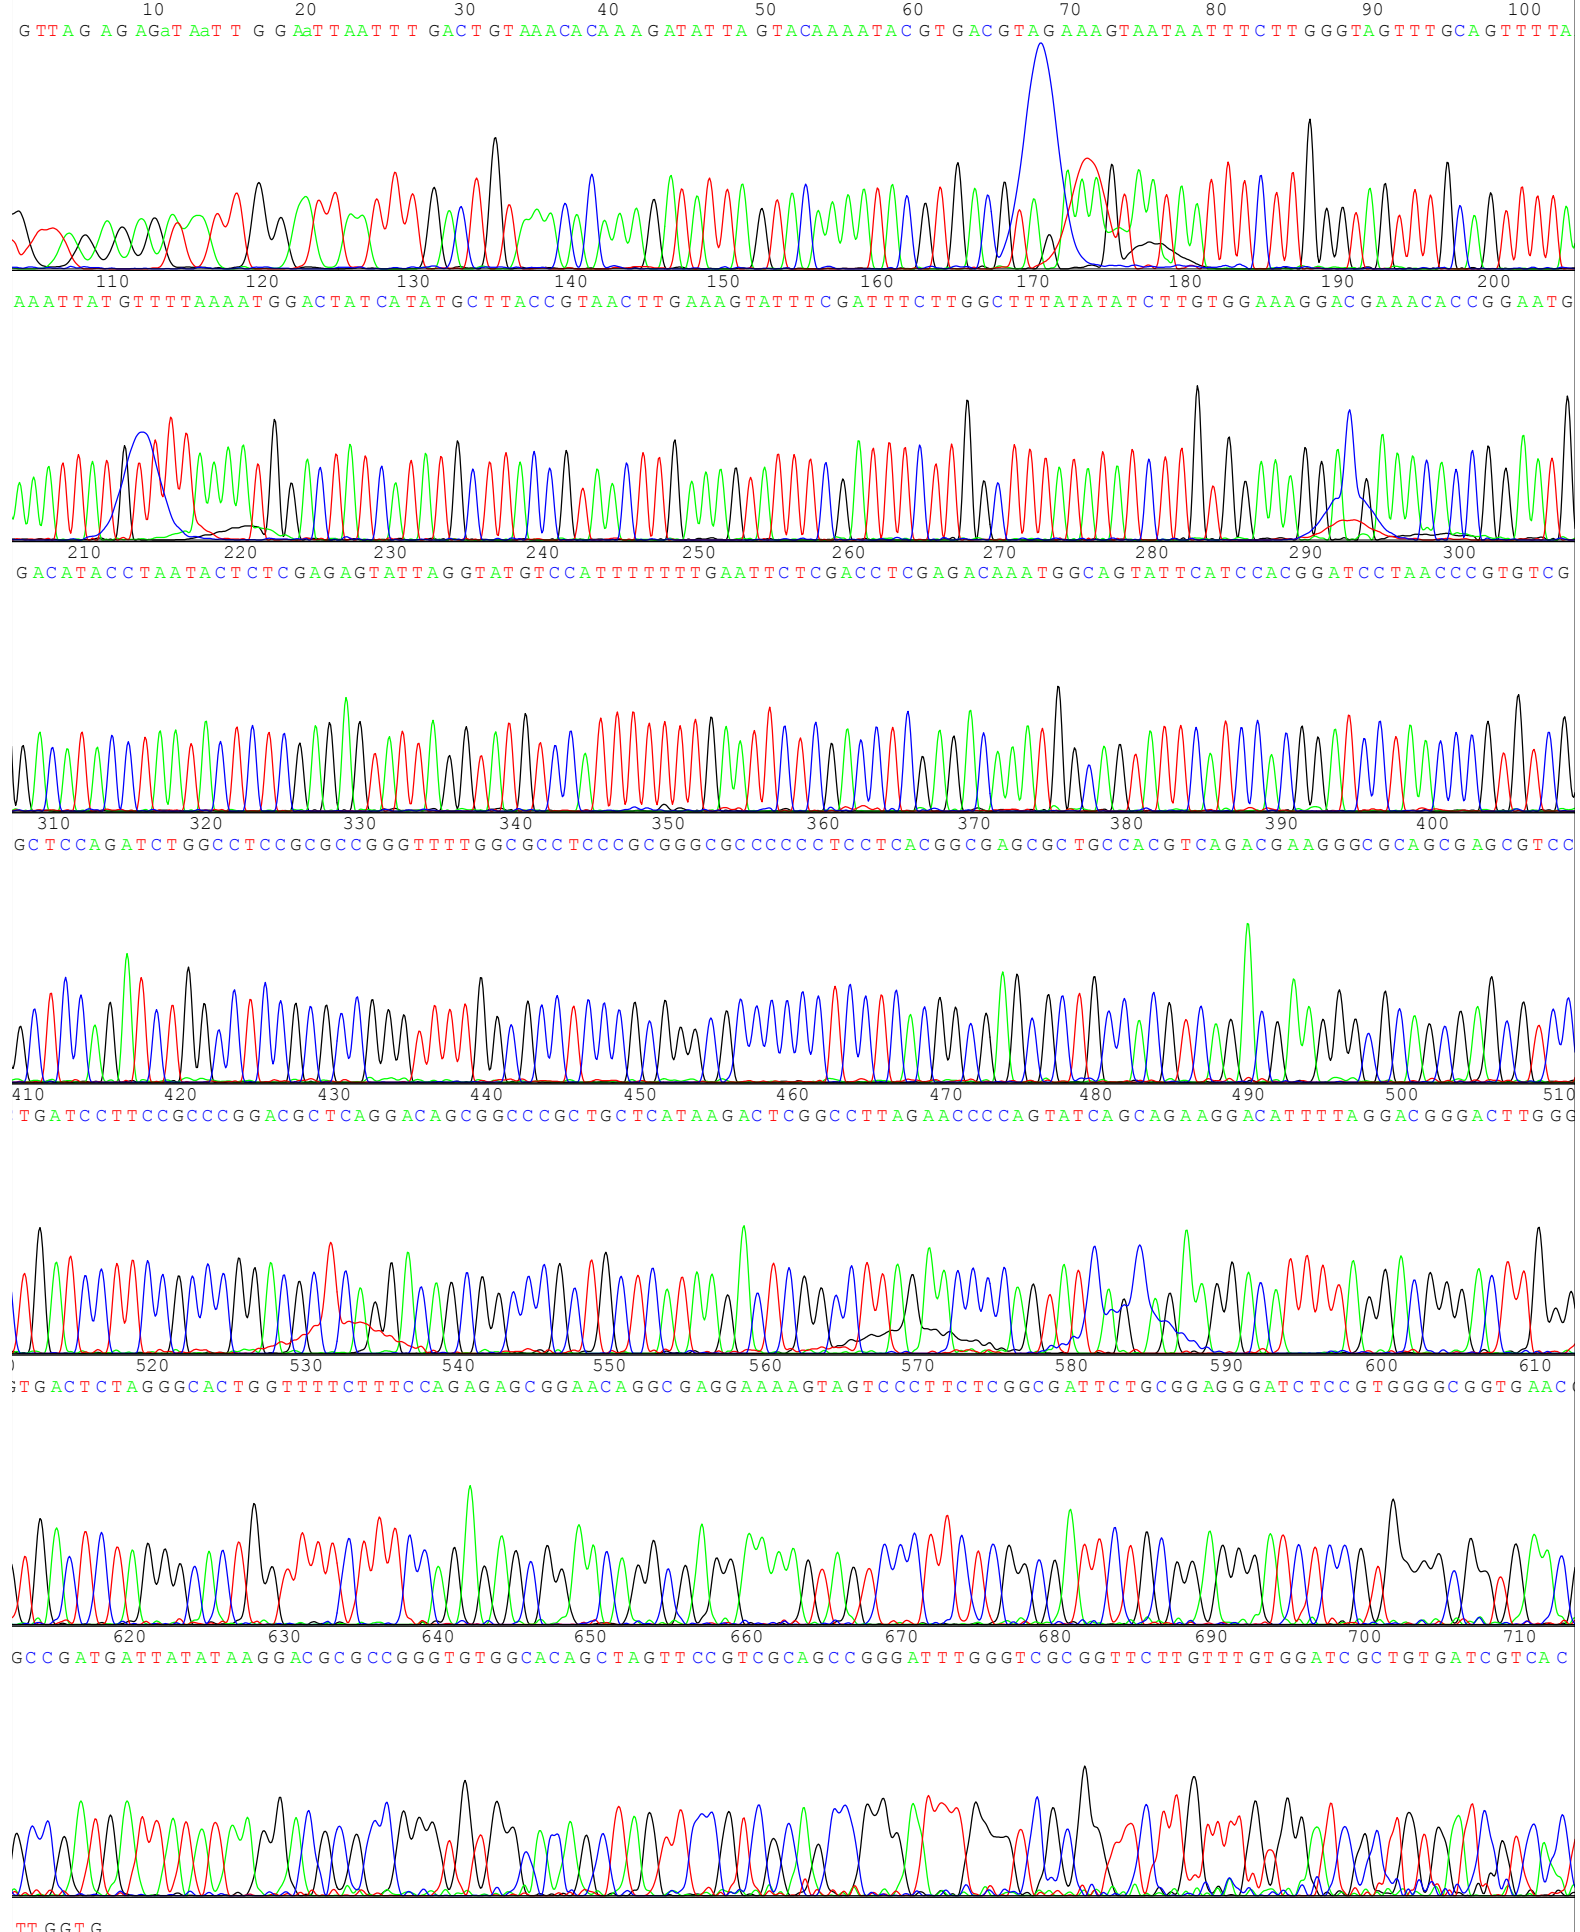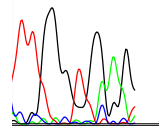

GTTAGAGAGaTAaTTGGAaTTAATTTGACTGTAAACACAAAGATATTAGTACAAAATACGTGACGTAGAAAGTAATAAT  
TTCTTGGGTAGTTTGCAGTTTTAAAATTATGTTTTAAAATGGACTATCATATGCTTACCGTAACTTGAAAGTATTTTGA  
TTTCTTGGCTTTATATATCTTGTGAAAGGACGAAACA**CCGGAATGGACATACCTAATACTCTCGAGAGTATTAGGTAT**  
**GTCCATTTTTT**GAATTCTCGACCTCGAGACAAATGGCAGTATTCATCCACGGATCCTAACCCGTGTCGGCTCCAGATC  
TGGCCTCCGCGCCGGGTTTTGGCGCCTCCCGCGGGCGCCCCCTCCTCACGGCGAGCGCTGCCACGTCAGACGAAGGGC  
GCAGCGAGCGTCCTGATCCTTCCGCCCCGACGCTCAGGACAGCGGCCCGCTGCTCATAAGACTCGGCCTTAGAACCCCA  
GTATCAGCAGAAGGACATTTTAGGACGGGACTTGGGTGACTCTAGGGCACTGGTTTTCTTTCCAGAGAGCGGAACAGGC  
GAGGAAAAGTAGTCCCTTCTCGGCGATTCTGCGGAGGGATCTCCGTGGGGCGGTGAACGCCGATGATTATATAAGGACG  
CGCCGGGTGTGGCACAGCTAGTCCGTTCGACCGGGATTGGGTTCGGGTTCTTGTTTGTGGATCGCTGTGATCGTCA  
CTTGGTG

PSC24973-1 ccggAATGGACATACCTAATACTctcgagAGTATTAGGTATGTCCATTTTTtg
